# Supplementary material
Source: HighWire-hosted journal article supplement (https://www.genetics.org/content/suppl/2013/12/05/genetics.113.158220)
Supplement: genetics.113.158220-8.pdf [file genetics.113.158220-8.pdf]

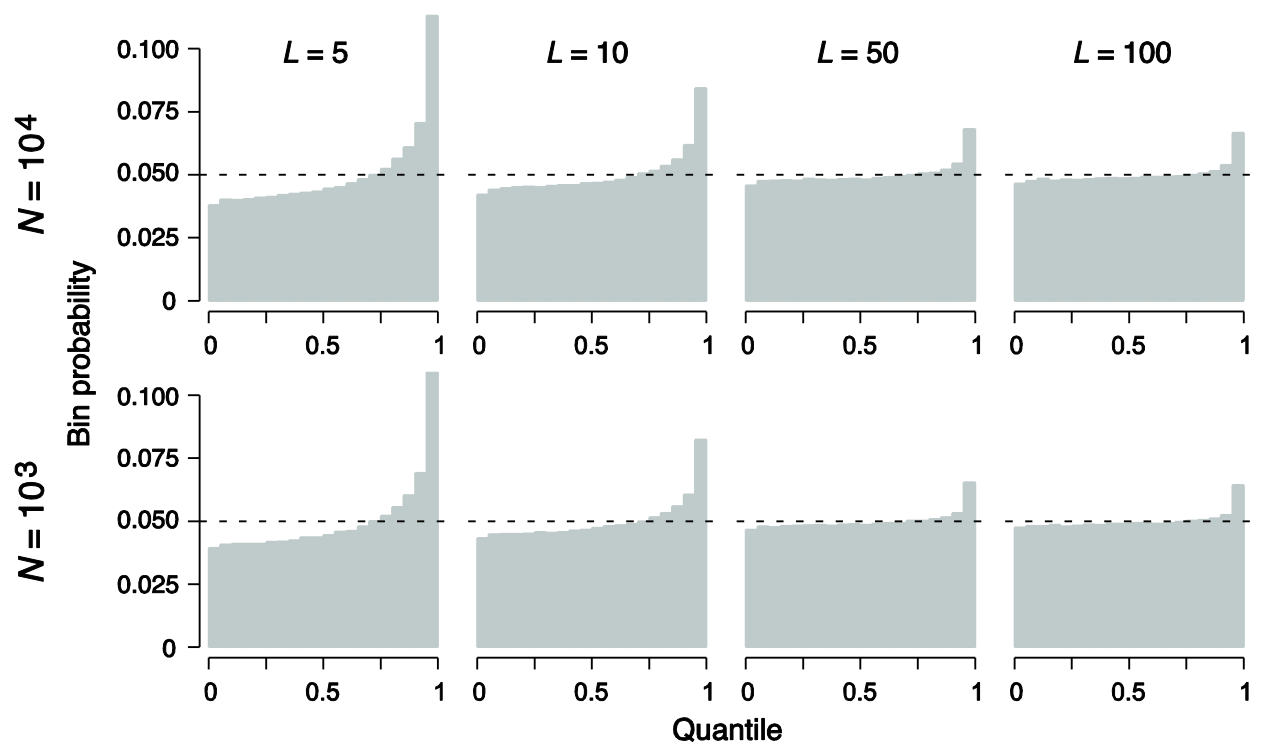

**Figure S1** Comparison of the true LRS distribution to the  $\chi^2$  distribution with 1 df. Panels show comparisons for different values of the population size  $N$  and the number of sampled time points  $L$ , as indicated on the left and on top. Notations are as in Figure 1. Parameter values:  $T = 100$ ,  $\Delta = 20$ ,  $v_0 = 0.5$ ; the number of Wright-Fisher simulations was  $10^6$ .
